# Supplementary material for: Crater lake cichlids individually specialize along the benthic–limnetic axis
Source: PubMed Central journal article supplement (PMC3997327; doi:10.1002/ece3.1015), 2014-03-07

(A)

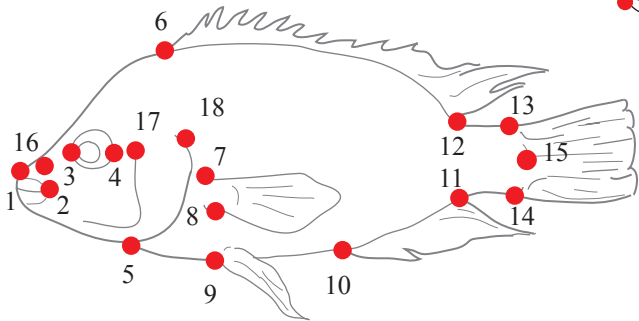

(B)

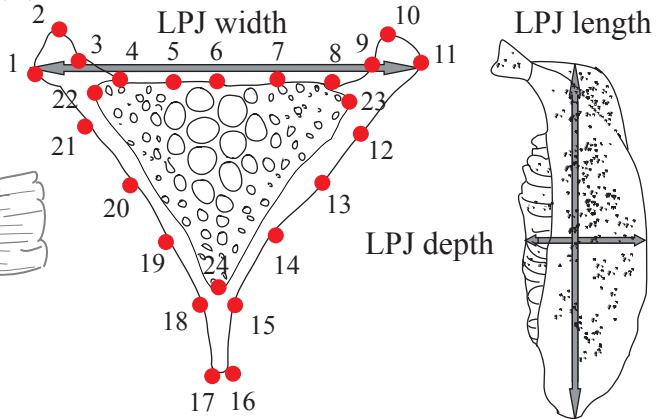

Supplement: ece30004-1127-sd1.pdf [file ece30004-1127-sd1.pdf]
